# Supplementary material for: Facile scission of isonitrile carbon–nitrogen triple bond using a diborane(4) reagent
Source: Springer Nature journal article supplement (doi:10.1038/ncomms5245), 2014-06-26
Supplement: 41467_2014_BFncomms5245_MOESM1_ESM.mol [file 41467_2014_BFncomms5245_MOESM1_ESM.mol]

  ChemDraw06101410112D

 28 30  0  0  0  0  0  0  0  0999 V2000
   -0.1634   -0.0000    0.0000 B   0  0  0  0  0  0  0  0  0  0  0  0
    0.6588   -0.0000    0.0000 B   0  0  0  0  0  0  0  0  0  0  0  0
   -0.6483    0.6674    0.0000 O   0  0  0  0  0  0  0  0  0  0  0  0
   -1.4329    0.4125    0.0000 C   0  0  0  0  0  0  0  0  0  0  0  0
   -1.4329   -0.4125    0.0000 C   0  0  0  0  0  0  0  0  0  0  0  0
   -0.6483   -0.6674    0.0000 O   0  0  0  0  0  0  0  0  0  0  0  0
   -2.2507    0.4984    0.0000 C   0  0  0  0  0  0  0  0  0  0  0  0
   -2.2507   -0.4984    0.0000 C   0  0  0  0  0  0  0  0  0  0  0  0
   -1.7674   -1.1636    0.0000 C   0  0  0  0  0  0  0  0  0  0  0  0
   -1.7674    1.1636    0.0000 C   0  0  0  0  0  0  0  0  0  0  0  0
    0.8724    0.7969    0.0000 C   0  0  0  0  0  0  0  0  0  0  0  0
    0.8724   -0.7969    0.0000 C   0  0  0  0  0  0  0  0  0  0  0  0
    1.6693    1.0104    0.0000 C   0  0  0  0  0  0  0  0  0  0  0  0
    1.8828    1.8073    0.0000 C   0  0  0  0  0  0  0  0  0  0  0  0
    1.2994    2.3907    0.0000 C   0  0  0  0  0  0  0  0  0  0  0  0
    0.5025    2.1771    0.0000 C   0  0  0  0  0  0  0  0  0  0  0  0
    0.2890    1.3803    0.0000 C   0  0  0  0  0  0  0  0  0  0  0  0
    0.2890   -1.3803    0.0000 C   0  0  0  0  0  0  0  0  0  0  0  0
    0.5025   -2.1771    0.0000 C   0  0  0  0  0  0  0  0  0  0  0  0
    1.2994   -2.3907    0.0000 C   0  0  0  0  0  0  0  0  0  0  0  0
    1.8828   -1.8073    0.0000 C   0  0  0  0  0  0  0  0  0  0  0  0
    1.6693   -1.0104    0.0000 C   0  0  0  0  0  0  0  0  0  0  0  0
   -0.5052   -1.1674    0.0000 C   0  0  0  0  0  0  0  0  0  0  0  0
    2.2507   -0.4290    0.0000 C   0  0  0  0  0  0  0  0  0  0  0  0
    1.5122   -3.1849    0.0000 C   0  0  0  0  0  0  0  0  0  0  0  0
    2.2507    0.4290    0.0000 C   0  0  0  0  0  0  0  0  0  0  0  0
   -0.5052    1.1674    0.0000 C   0  0  0  0  0  0  0  0  0  0  0  0
    1.5122    3.1849    0.0000 C   0  0  0  0  0  0  0  0  0  0  0  0
  1  2  1  0      
  1  3  1  0      
  3  4  1  0      
  4  5  1  0      
  5  6  1  0      
  6  1  1  0      
  4  7  1  0      
  5  8  1  0      
  5  9  1  0      
  4 10  1  0      
  2 11  1  0      
  2 12  1  0      
 11 13  2  0      
 13 14  1  0      
 14 15  2  0      
 15 16  1  0      
 16 17  2  0      
 17 11  1  0      
 12 18  2  0      
 18 19  1  0      
 19 20  2  0      
 20 21  1  0      
 21 22  2  0      
 22 12  1  0      
 18 23  1  0      
 22 24  1  0      
 20 25  1  0      
 13 26  1  0      
 17 27  1  0      
 15 28  1  0      
M  END
