# Supplementary material for: Facile scission of isonitrile carbon–nitrogen triple bond using a diborane(4) reagent
Source: Springer Nature journal article supplement (doi:10.1038/ncomms5245), 2014-06-26
Supplement: 41467_2014_BFncomms5245_MOESM7_ESM.mol [file 41467_2014_BFncomms5245_MOESM7_ESM.mol]

  ChemDraw06101410112D

 40 42  0  0  0  0  0  0  0  0999 V2000
    0.4409   -0.0551    0.0000 B   0  5  0  0  0  0  0  0  0  0  0  0
    1.2632   -0.0551    0.0000 C   0  0  0  0  0  0  0  0  0  0  0  0
    0.0298    0.6570    0.0000 C   0  0  0  0  0  0  0  0  0  0  0  0
   -0.1704   -0.9684    0.0000 N   0  0  0  0  0  0  0  0  0  0  0  0
    1.6743   -0.7671    0.0000 C   0  0  0  0  0  0  0  0  0  0  0  0
    1.6743    0.6570    0.0000 C   0  0  0  0  0  0  0  0  0  0  0  0
    2.4993    0.6570    0.0000 C   0  0  0  0  0  0  0  0  0  0  0  0
    2.9118    1.3715    0.0000 C   0  0  0  0  0  0  0  0  0  0  0  0
    2.4993    2.0859    0.0000 C   0  0  0  0  0  0  0  0  0  0  0  0
    1.6743    2.0859    0.0000 C   0  0  0  0  0  0  0  0  0  0  0  0
    1.2618    1.3715    0.0000 C   0  0  0  0  0  0  0  0  0  0  0  0
    1.2618   -1.4816    0.0000 C   0  0  0  0  0  0  0  0  0  0  0  0
    1.6743   -2.1961    0.0000 C   0  0  0  0  0  0  0  0  0  0  0  0
    2.4993   -2.1961    0.0000 C   0  0  0  0  0  0  0  0  0  0  0  0
    2.9118   -1.4816    0.0000 C   0  0  0  0  0  0  0  0  0  0  0  0
    2.4993   -0.7671    0.0000 C   0  0  0  0  0  0  0  0  0  0  0  0
    2.9104   -2.9082    0.0000 C   0  0  0  0  0  0  0  0  0  0  0  0
    0.4396   -1.4816    0.0000 C   0  0  0  0  0  0  0  0  0  0  0  0
    2.9104    2.7980    0.0000 C   0  0  0  0  0  0  0  0  0  0  0  0
    0.4396    1.3715    0.0000 C   0  0  0  0  0  0  0  0  0  0  0  0
    3.0827    0.0736    0.0000 C   0  0  0  0  0  0  0  0  0  0  0  0
    3.0827   -0.1838    0.0000 C   0  0  0  0  0  0  0  0  0  0  0  0
   -0.3827    1.3715    0.0000 N   0  3  0  0  0  0  0  0  0  0  0  0
   -0.7952    2.0859    0.0000 C   0  0  0  0  0  0  0  0  0  0  0  0
   -1.6174    2.0859    0.0000 C   0  0  0  0  0  0  0  0  0  0  0  0
   -0.0831    2.4970    0.0000 C   0  0  0  0  0  0  0  0  0  0  0  0
   -0.7952    2.9082    0.0000 C   0  0  0  0  0  0  0  0  0  0  0  0
    0.0431   -1.7653    0.0000 C   0  0  0  0  0  0  0  0  0  0  0  0
    0.8373   -1.9781    0.0000 C   0  0  0  0  0  0  0  0  0  0  0  0
   -0.7511   -1.9781    0.0000 C   0  0  0  0  0  0  0  0  0  0  0  0
   -0.1697   -2.5595    0.0000 C   0  0  0  0  0  0  0  0  0  0  0  0
   -0.9954   -0.9684    0.0000 B   0  0  0  0  0  0  0  0  0  0  0  0
   -1.4803   -0.3009    0.0000 O   0  0  0  0  0  0  0  0  0  0  0  0
   -2.2649   -0.5559    0.0000 C   0  0  0  0  0  0  0  0  0  0  0  0
   -2.2649   -1.3809    0.0000 C   0  0  0  0  0  0  0  0  0  0  0  0
   -1.4803   -1.6358    0.0000 O   0  0  0  0  0  0  0  0  0  0  0  0
   -2.5994    0.1953    0.0000 C   0  0  0  0  0  0  0  0  0  0  0  0
   -3.0827   -0.4699    0.0000 C   0  0  0  0  0  0  0  0  0  0  0  0
   -3.0827   -1.4668    0.0000 C   0  0  0  0  0  0  0  0  0  0  0  0
   -2.5994   -2.1320    0.0000 C   0  0  0  0  0  0  0  0  0  0  0  0
  1  2  2  0      
  1  3  1  0      
  1  4  1  0      
  2  5  1  0      
  2  6  1  0      
  6  7  2  0      
  7  8  1  0      
  8  9  2  0      
  9 10  1  0      
 10 11  2  0      
 11  6  1  0      
  5 12  2  0      
 12 13  1  0      
 13 14  2  0      
 14 15  1  0      
 15 16  2  0      
 16  5  1  0      
 14 17  1  0      
 12 18  1  0      
  9 19  1  0      
 11 20  1  0      
  7 21  1  0      
 16 22  1  0      
  3 23  3  0      
 23 24  1  0      
 24 25  1  0      
 24 26  1  0      
 24 27  1  0      
  4 28  1  0      
 28 29  1  0      
 28 30  1  0      
 28 31  1  0      
  4 32  1  0      
 32 33  1  0      
 33 34  1  0      
 34 35  1  0      
 35 36  1  0      
 36 32  1  0      
 34 37  1  0      
 34 38  1  0      
 35 39  1  0      
 35 40  1  0      
M  CHG  2   1  -1  23   1
M  END
